## CORRECTION

# Correction: Reduced variability of neural progenitor cells and improved purity of neuronal cultures using magnetic activated cell sorting

The *PLOS ONE* Staff

The co-first author's name is spelled incorrectly. The publisher apologizes for the error. The correct name is: Julia TCW. The correct citation is:

Bowles KR, TCW J, Qian L, Jadow BM, Goate AM (2019) Reduced variability of neural progenitor cells and improved purity of neuronal cultures using magnetic activated cell sorting. *PLoS ONE* 14(3): e0213374. <https://doi.org/10.1371/journal.pone.0213374>.

## Reference

1. Bowles KR, T. C. W. J, Qian L, Jadow BM, Goate AM (2019) Reduced variability of neural progenitor cells and improved purity of neuronal cultures using magnetic activated cell sorting. *PLoS ONE* 14(3): e0213374. <https://doi.org/10.1371/journal.pone.0213374> PMID: 30917153

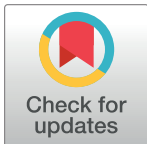

## OPEN ACCESS

**Citation:** The *PLOS ONE* Staff (2019) Correction: Reduced variability of neural progenitor cells and improved purity of neuronal cultures using magnetic activated cell sorting. *PLoS ONE* 14(4): e0216312. <https://doi.org/10.1371/journal.pone.0216312>

**Published:** April 25, 2019

**Copyright:** © 2019 The PLOS ONE Staff. This is an open access article distributed under the terms of the [Creative Commons Attribution License](https://creativecommons.org/licenses/by/4.0/), which permits unrestricted use, distribution, and reproduction in any medium, provided the original author and source are credited.
